# Supplementary material
Source: Springer Nature journal article supplement (https://www.springermedizin.de/resource/supplementary/12990_2010_347_MOESM5_ESM.pdf/9613084)

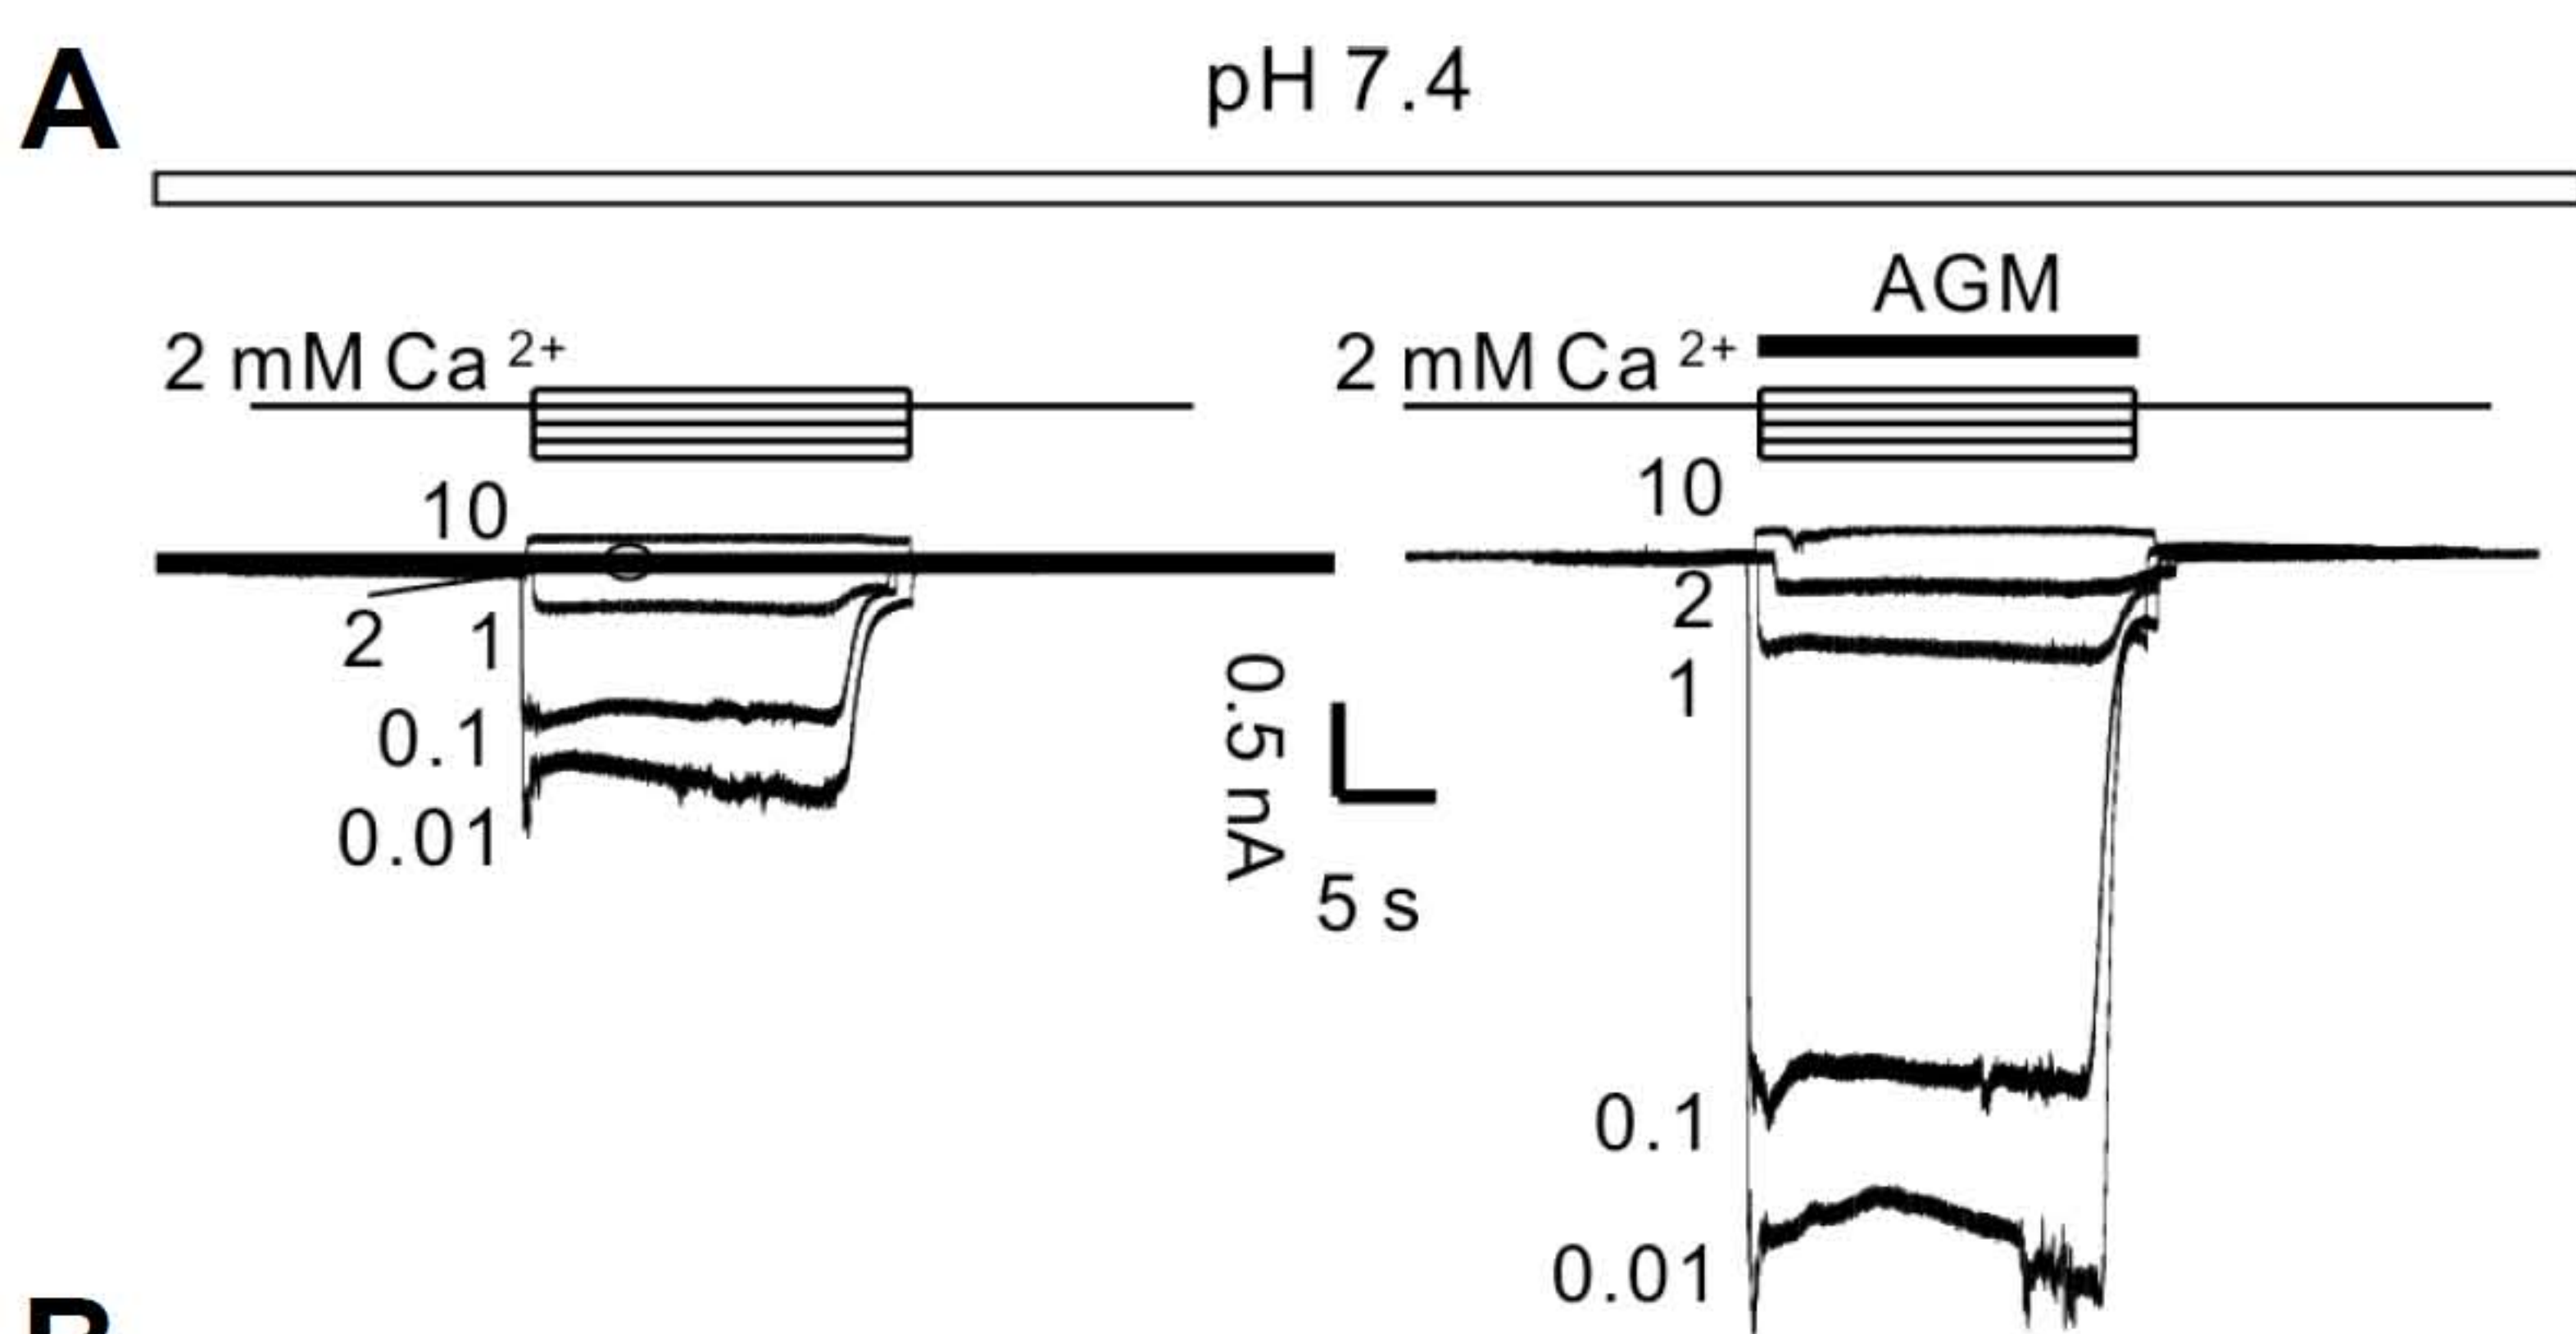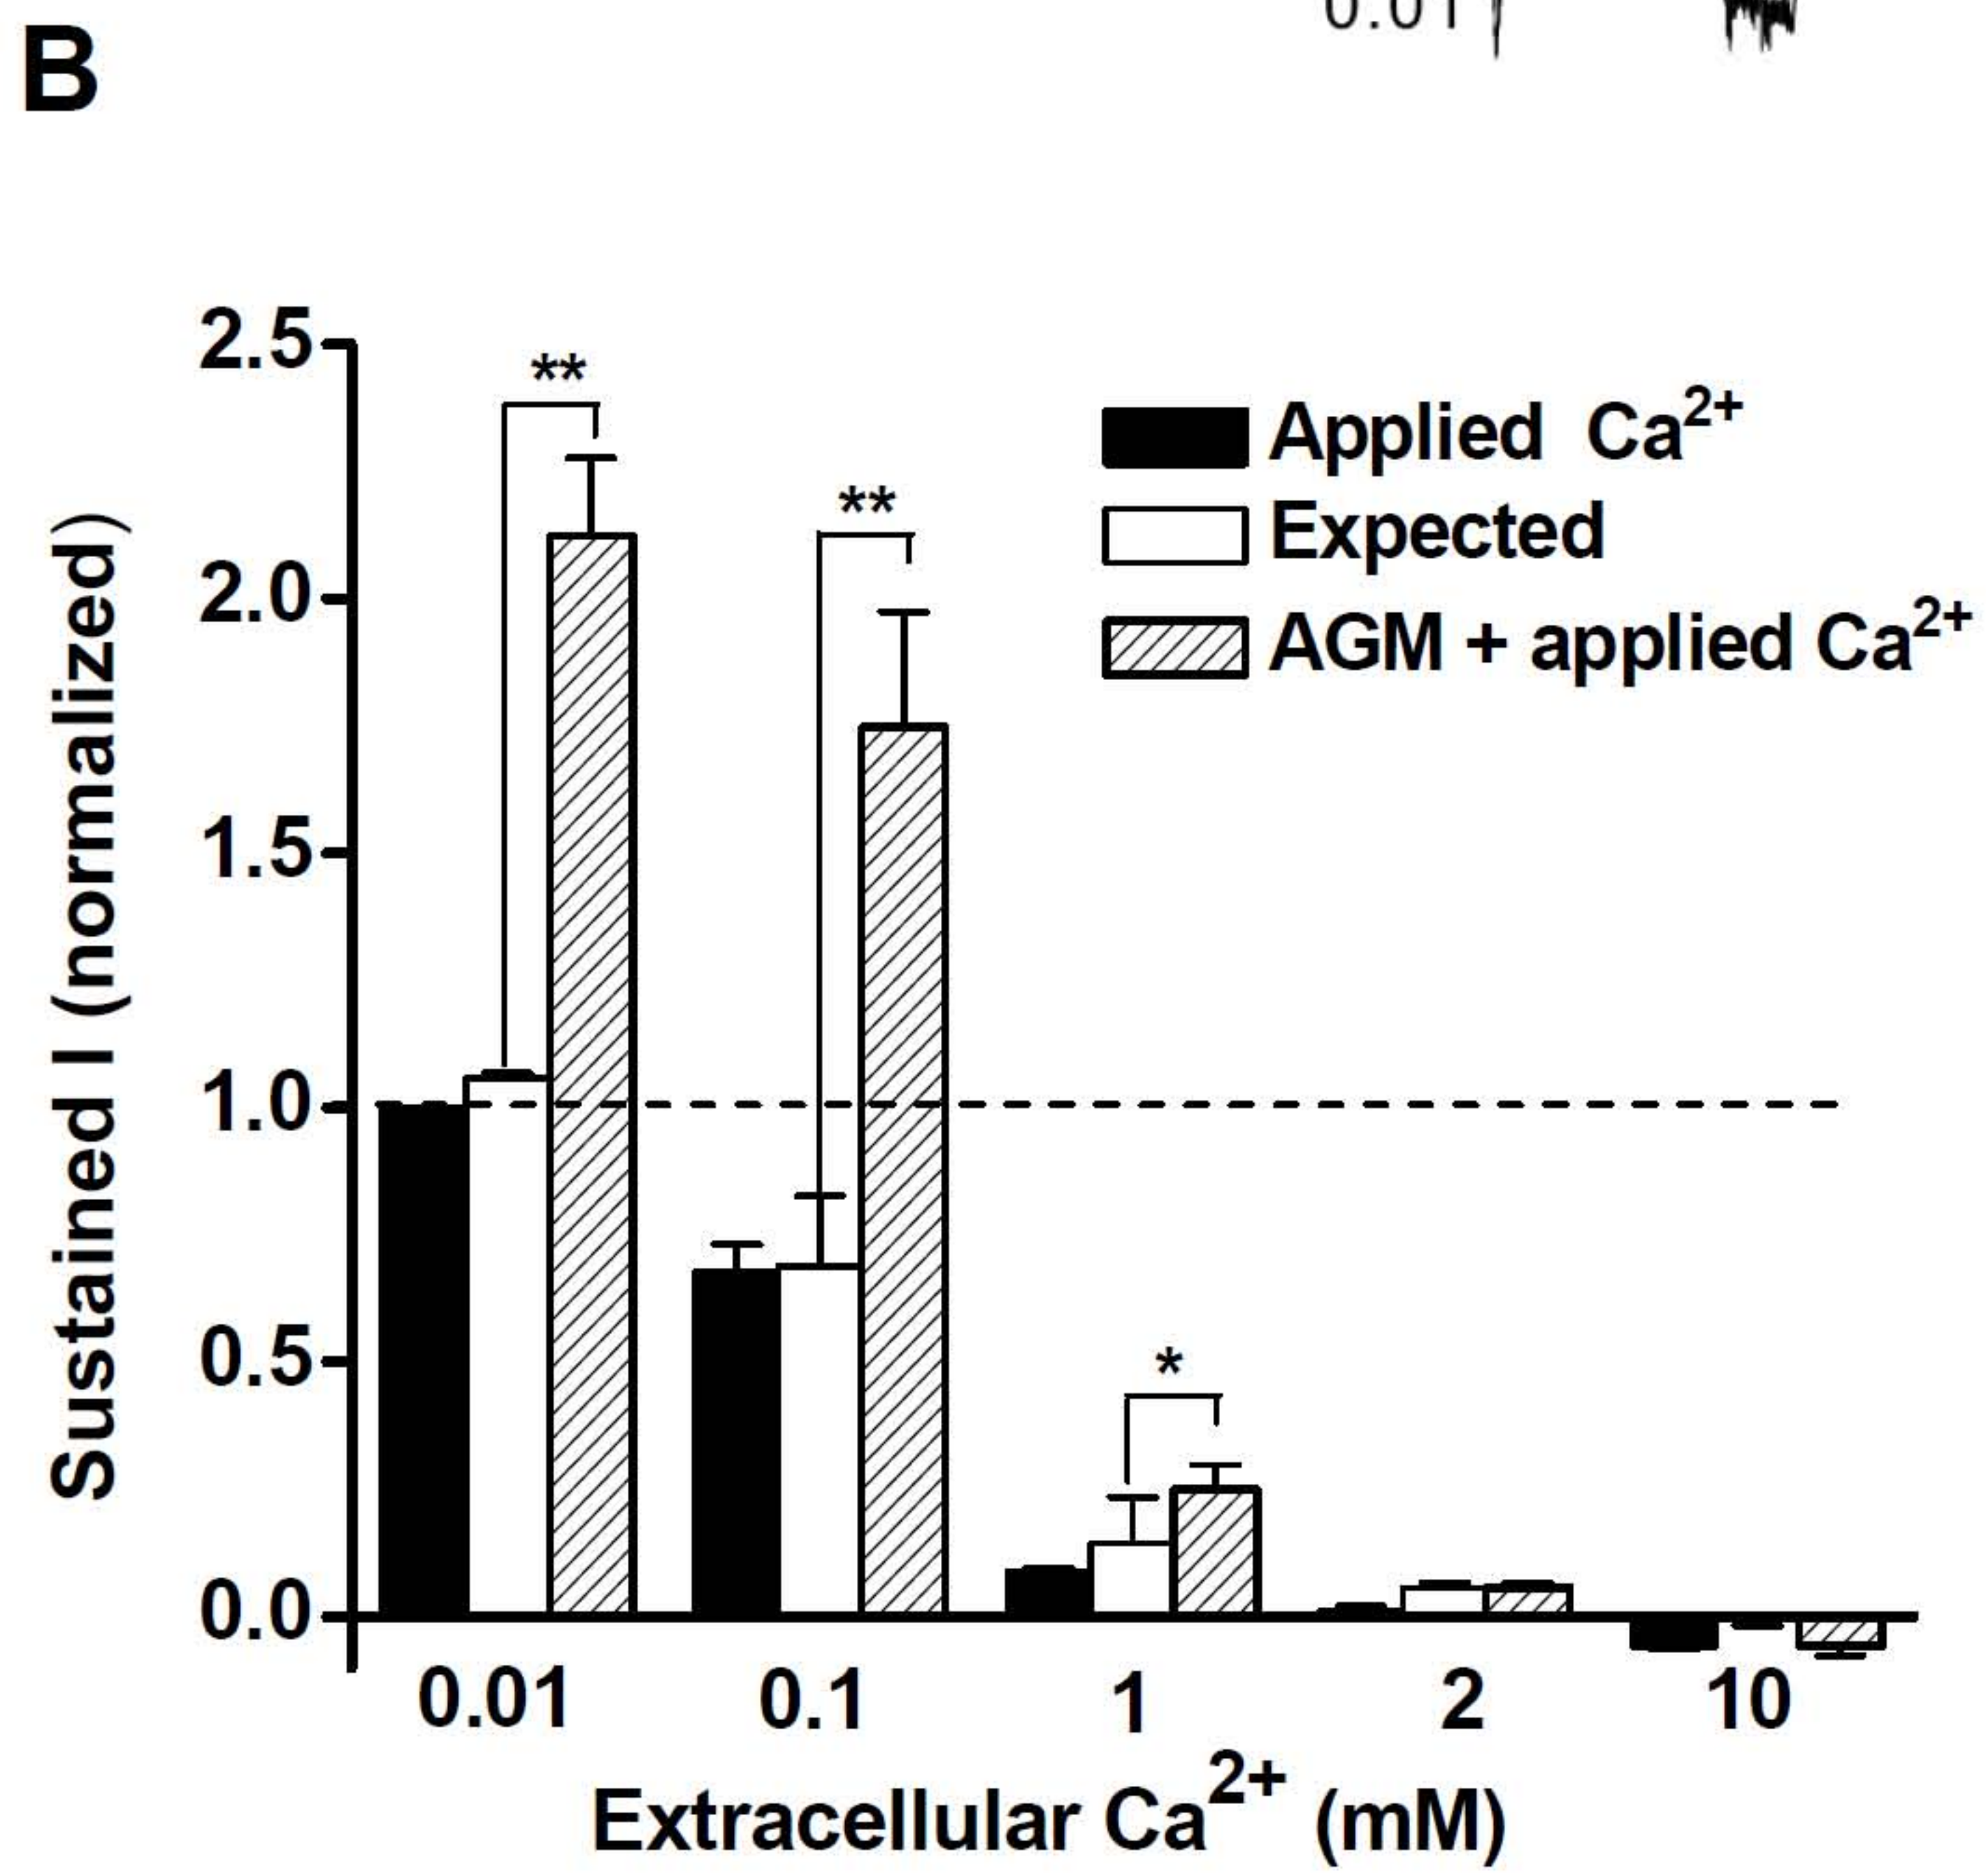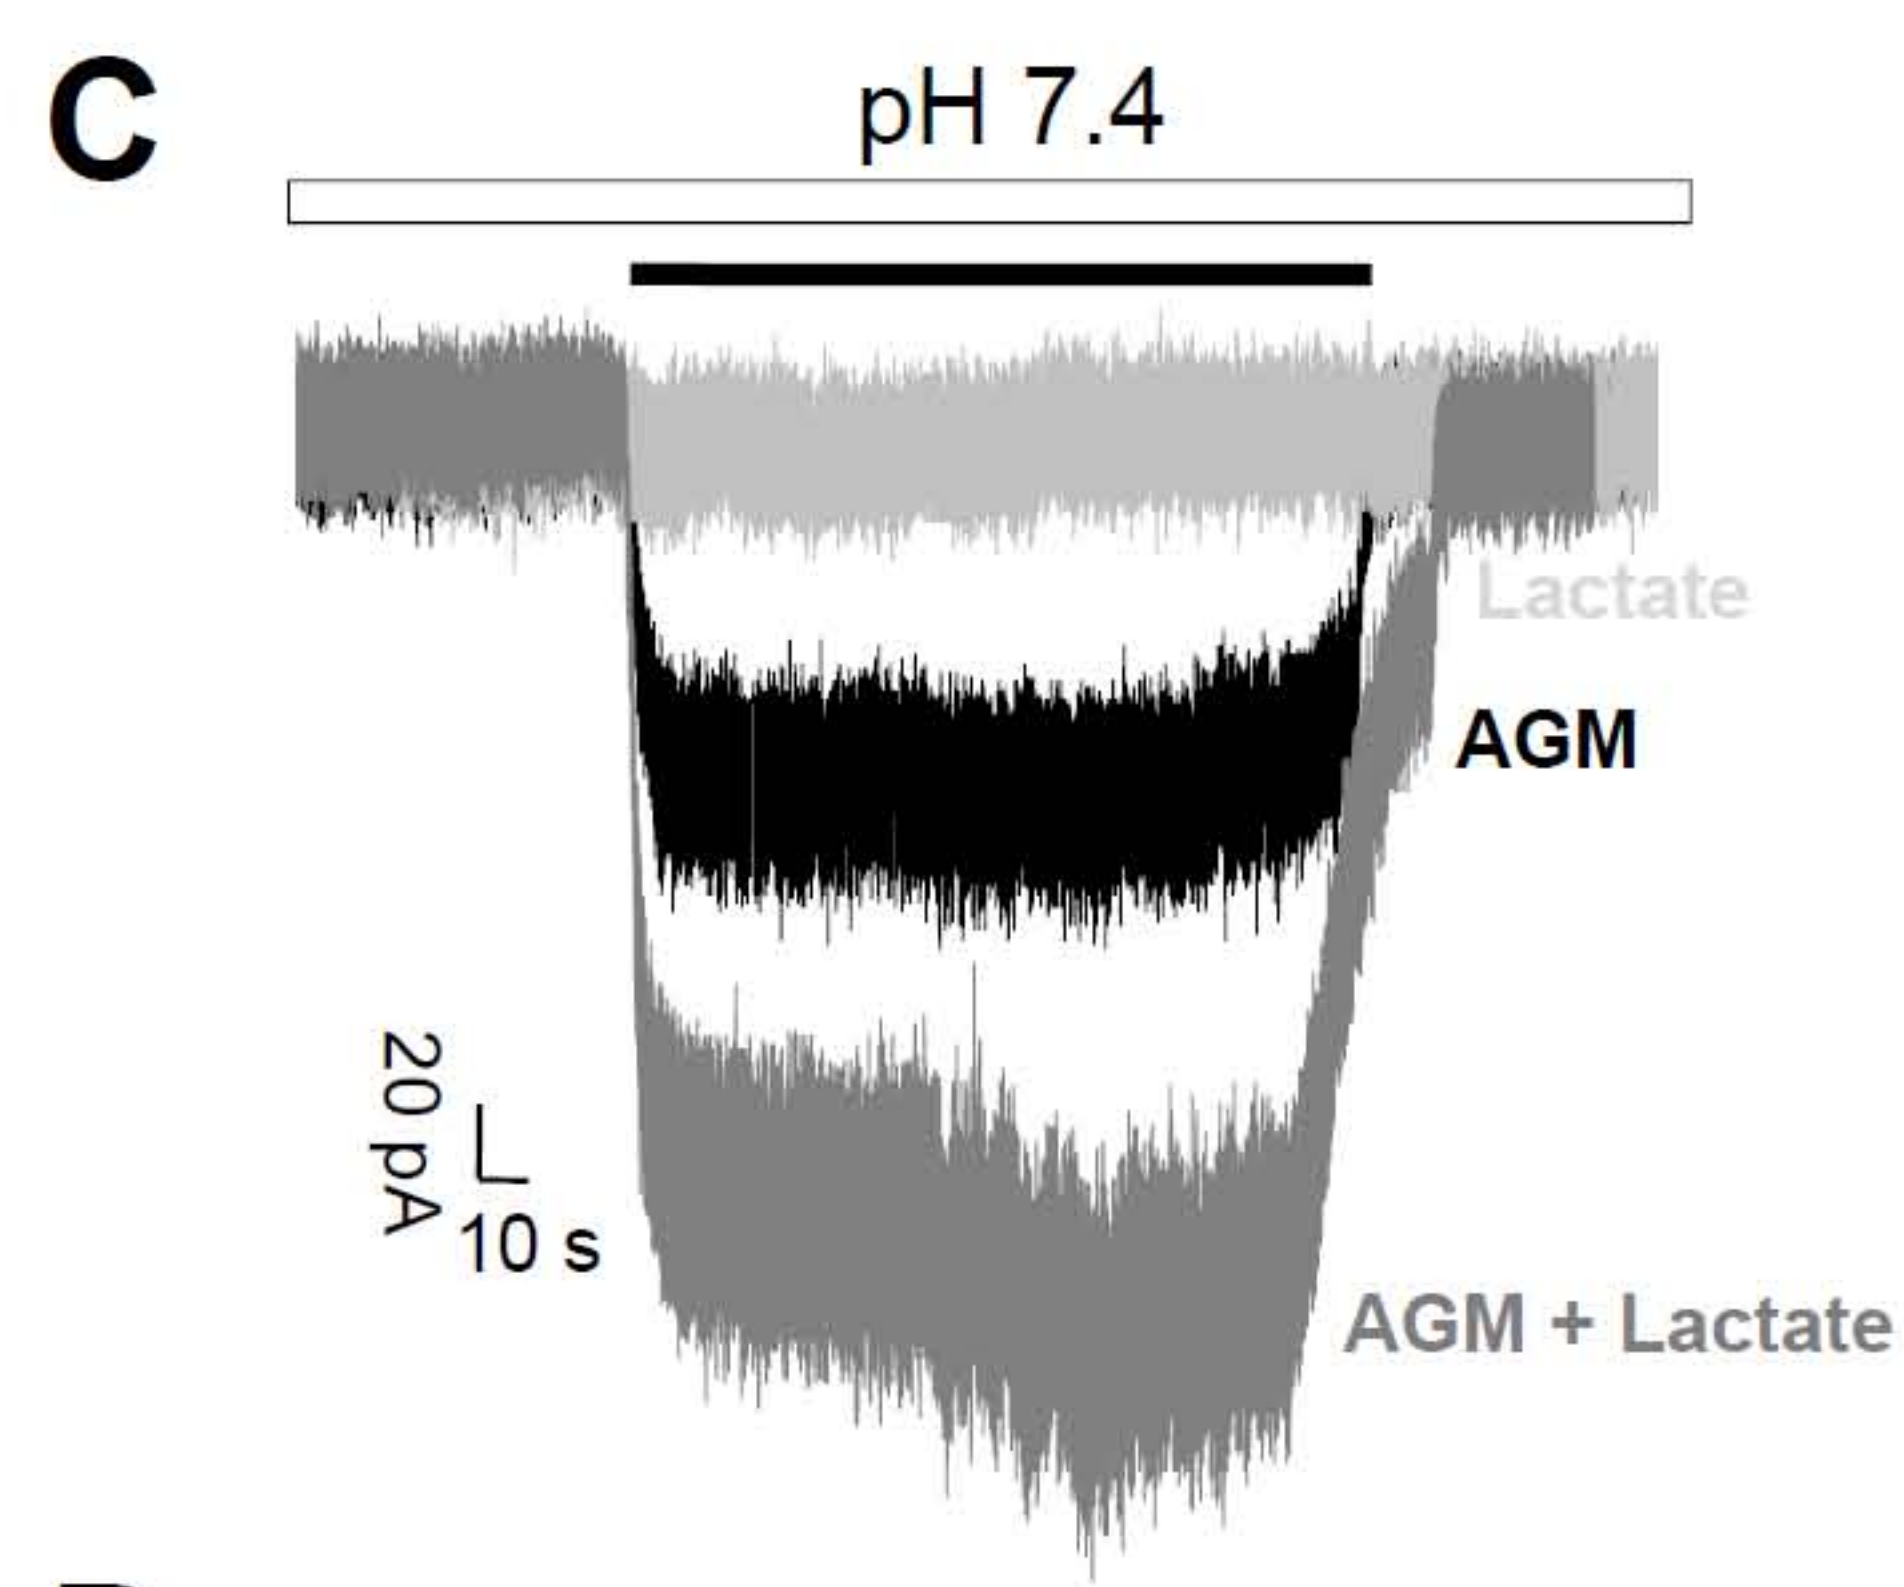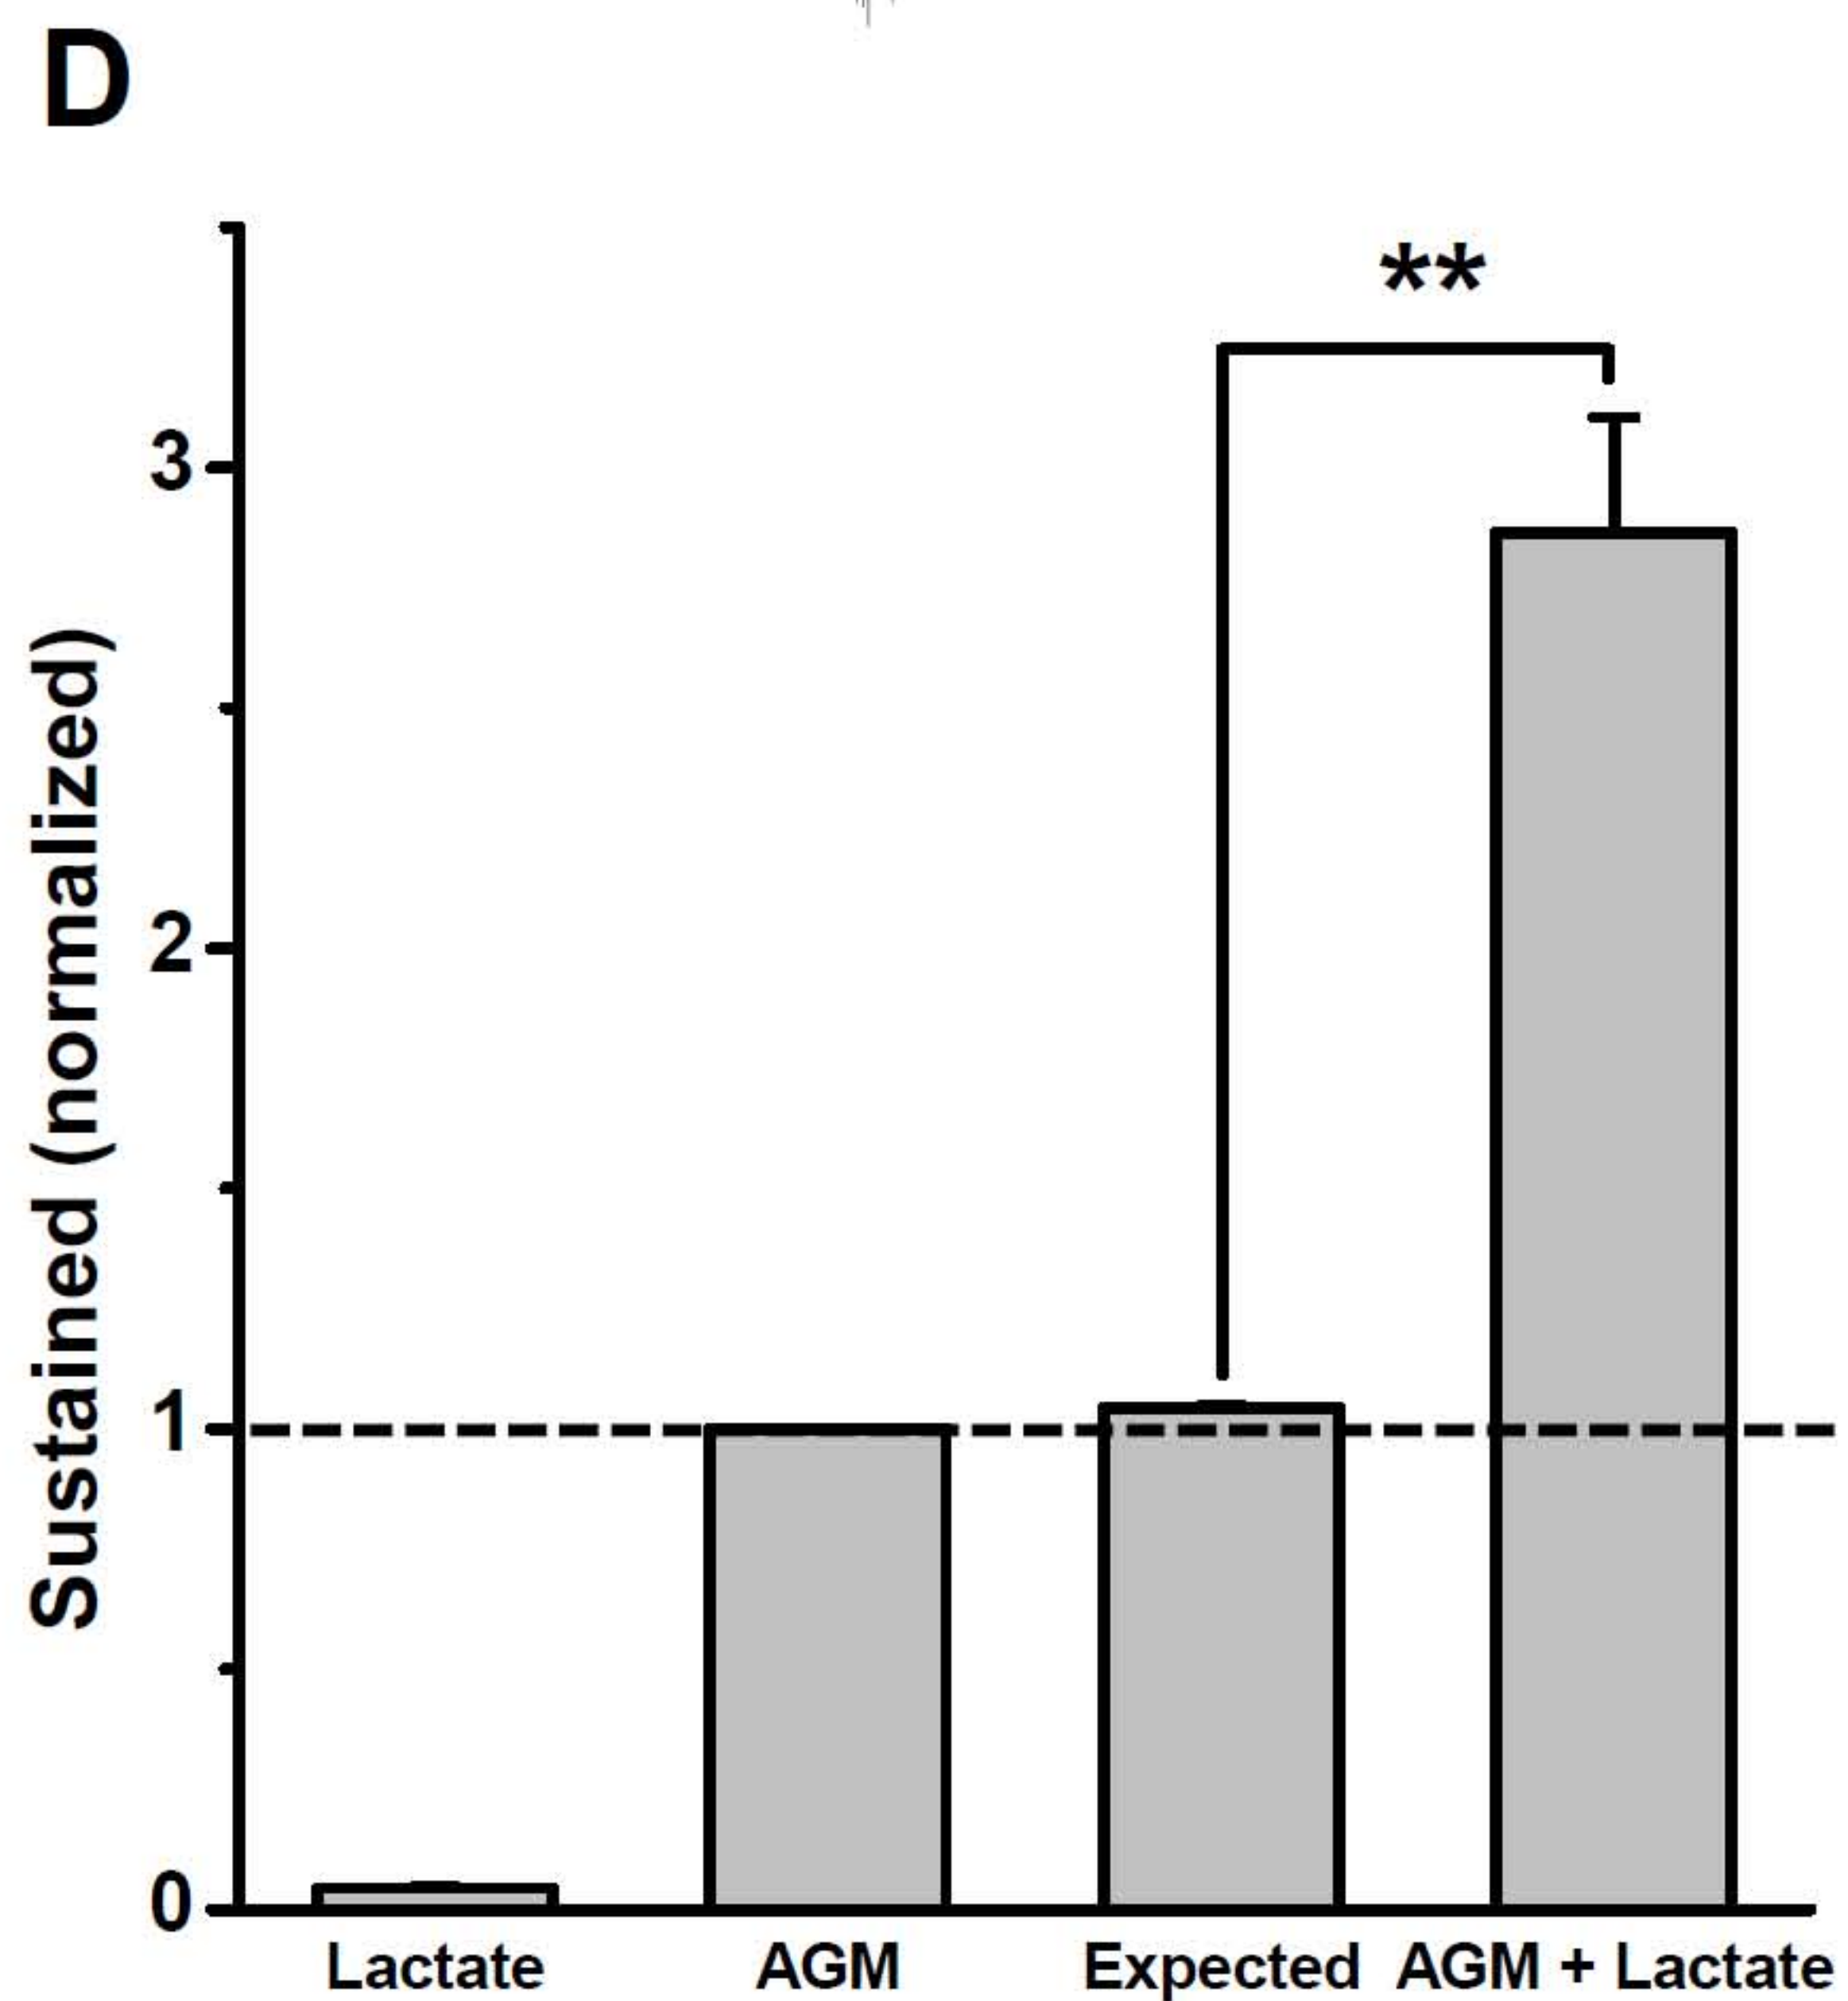

Supplement: MOESM5 [file 9613084]
